# Supplementary material for: Thermal rearrangement of tert-butylsulfinamide
Source: publisher site journal article supplement (doi:10.3762/bjoc.7.2), 2011-01-04
Supplement: Additional file 1 [file 1860-5397-7-2-S1.pdf]

# Supporting Information

for

## **Thermal rearrangement of *tert*-butylsulfonamide**

Veera Reddy Arava<sup>\*1</sup>, Laxminarasimhulu Gorentla<sup>1</sup>, Pramod Kumar Dubey<sup>2</sup>

<sup>1</sup>R&D Laboratories, SUVEN Life Sciences Ltd, #18, Phase III, Jeedimetla,  
Hyderabad – 500 055, India.

<sup>2</sup>Department of Chemistry, J.N.T University, Hyderabad 500 072, India

|                                                                                              | Page No |
|----------------------------------------------------------------------------------------------|---------|
| Experimental Section                                                                         | S2      |
| Chemical synthesis of <i>N</i> -( <i>tert</i> -butylthio)- <i>tert</i> -butylsulfonamide (3) |         |
| Rearrangement of <i>tert</i> -butanesulfonamide                                              | S3      |

## General Procedure

### Chemical synthesis of *N*-(*tert*-butylthio)-*tert*-butylsulfonamide (**3**)

*tert*-Butylsulfonamide (2.4 g, 0.017 mol) was dissolved in 12.0 mL ethyl acetate and DBU (5.3 g, 0.034 mol) added at ambient temperature. *tert*-Butylsulfenyl chloride (~2.2 g, 0.017 mol, based on app. 80% yield) in *n*-pentane (10.0 mL) was added dropwise at 25–30 °C over a period of 10 minutes. After complete addition, the reaction mixture (pale yellow sticky mass) was stirred for 1 hour (progress of the reaction was monitored on precoated silica gel plates and visualized with iodine vapors). Water (10.0 mL) was added and the layers were separated. The aqueous layer was extracted once with ethyl acetate (10.0 mL), the combined organic layers were washed twice with water (10.0 mL) and dried over anhydrous Na<sub>2</sub>SO<sub>4</sub>. Evaporation of the solvent under vacuum resulted in a residue, which was mixed with ether (10.0 mL) and *n*-hexane (20.0 mL) and the crystals were filtered and washed with ether (1.5 mL). The product was purified by column chromatography with 4% ethyl acetate:*n*-hexane as eluent to afford 1.18 g of **3** as white crystals.

Yield: 30%; mp: 159.8–161.8 °C; HPLC Purity: 99%;

IR (cm<sup>-1</sup>, KBr): 3238 (sharp peak of -NH), 1364 (sharp peak of asym -SO<sub>2</sub>), 1298 (sharp peak of sym -SO<sub>2</sub>), 889 (sharp peak of S-N).

<sup>1</sup>H NMR (TMS/CDCl<sub>3</sub>): δ = 1.32 (s, 9H, C(CH<sub>3</sub>)<sub>3</sub>), 1.43 (s, 9H, C(CH<sub>3</sub>)<sub>3</sub>), 5.18 (s, 1H, -NH).

<sup>13</sup>C NMR (TMS/CDCl<sub>3</sub>): δ = 24.62, 28.00, 48.46 and 61.14.

ESI-MS (-Ve mode): m/z (%) = 224.3 [M-1].

### Rearrangement of *tert*-butylsulfonamide

*tert*-Butylsulfonamide (10.0 g, 0.08 mol) was dissolved in toluene (100.0 mL) at room temperature. The resulting clear colorless solution was heated under reflux and stirred for 48 hours (progress of the reaction was monitored by TLC and the spots were visualized with iodine vapors). After the completion of the reaction, as determined by TLC, the solution was cooled to rt and washed twice with water (50.0 mL). The toluene layer was dried over anhydrous Na<sub>2</sub>SO<sub>4</sub> (10.0 g) and concentrated under vacuum. The obtained solid was slurried in *n*-hexane (50.0 mL) at rt and filtered to obtain a white crystalline solid (94% purity), which was recrystallized from ethyl acetate.

Yield: 70%; mp: 162–164 °C; HPLC Purity: 99.5%; [ $\alpha$ ]<sub>D</sub><sup>20</sup> (c = 1.0, CHCl<sub>3</sub>): 0°.

### HPLC Conditions

Column: Ymc pack C8 250X4.6mm 5 $\mu$ m (SRC-598); Eluent: Mobile phase A: Water pH adjusted to 2.5 with orthophosphoric acid; Mobile phase B: Acetonitrile; Flow rate: 1.0 mL/min; Detector: UV (210 nm).
